# Supplementary material for: A Comparative Genome Analysis of PME and PMEI Families Reveals the Evolution of Pectin Metabolism in Plant Cell Walls
Source: PLoS One. 2013 Aug 12;8(8):e72082. doi: 10.1371/journal.pone.0072082 (PMC3741192; doi:10.1371/journal.pone.0072082)
Supplement: Table S2 — The identified orthologous groups of the PME family genes in 11 representative species. The orthologous genes were defined as genes in a cluster from at least three species. This analysis was conducted using Orthomcl software. (XLSX) [file pone.0072082.s009.xlsx]

## Sheet: Sheet1
Table S2. Identified othologous groups of the PME family in 11 representative species.
groups			GeneID
ORTHOMCL1(23genes,10taxa):			Sm101118	Sm232546	Sm83744	Sm89509	AT1G44980	AT3G27980	GSVIVT01023135001	GSVIVT01038546001	LOC_Os01g21034.1	LOC_Os04g35770.1	Potri.002G145700.1	Pp1s149_288V6.1	Pp1s378_15V6.1	Sb02g028740.1	Sb06g017280.1	Solyc01g091060.1.1	Solyc02g062150.1.1	Solyc06g009180.1.1	corb_Contig3040	corb_UMD_Coleochaete_c5134_c_s	evm.TU.supercontig_116.68	evm.TU.supercontig_116.69	evm.TU.supercontig_344.2
ORTHOMCL2(19genes,5taxa):			AT1G69940	AT5G07410	AT5G07420	AT5G07430	AT5G61680	GSVIVT01013832001	GSVIVT01013838001	GSVIVT01013839001	Potri.006G186000.1	Potri.006G186100.1	Potri.012G112800.1	Potri.012G114900.1	Potri.012G115200.1	Potri.015G110700.1	Solyc05g052110.2.1	Solyc05g052120.2.1	evm.TU.supercontig_3.25	evm.TU.supercontig_3.26	evm.TU.supercontig_3.28
ORTHOMCL3(18genes,11taxa):			Sm65663	Sm76951	AT5G19730	GSVIVT01015290001	GSVIVT01018823001	LOC_Os01g53990.1	LOC_Os05g44600.1	Potri.007G015700.1	Potri.018G068400.1	Pp1s118_31V6.1	Sb03g034250.1	Sb09g026060.1	Solyc02g075620.2.1	Solyc12g008530.1.1	corb_UMD_Coleochaete_c17374_c_s	corb_UMD_Coleochaete_c3973_c_s	evm.TU.supercontig_860.2	evm_15.model.AmTr_v1.0_scaffold00056.121
ORTHOMCL4(11genes,10taxa):			Sm164202	AT3G29090	GSVIVT01011459001	LOC_Os10g26680.1	Potri.004G128900.1	Potri.T007200.1	Pp1s129_155V6.1	Sb01g022290.1	Solyc00g027770.2.1	evm.TU.supercontig_14.107	evm_15.model.AmTr_v1.0_scaffold00010.392
ORTHOMCL5(11genes,10taxa):			Sm165098	AT5G47500	GSVIVT01001327001	LOC_Os04g46740.1	Potri.003G076900.1	Pp1s325_49V6.1	Pp1s35_24V6.1	Sb06g024730.1	Solyc08g078640.1.1	evm.TU.supercontig_29.155	evm_15.model.AmTr_v1.0_scaffold00106.56
ORTHOMCL6(10genes,8taxa):			Sm101090	GSVIVT01028170001	LOC_Os12g37660.1	Potri.014G117100.1	Pp1s23_141V6.1	Pp1s55_167V6.1	Pp1s67_89V6.1	Sb08g018360.1	Solyc01g079180.2.1	evm.TU.supercontig_145.20
ORTHOMCL7(10genes,7taxa):			AT3G24130	AT5G18990	GSVIVT01000525001	LOC_Os01g19440.1	Potri.017G054700.1	Sb03g012410.1	Solyc05g053680.1.1	Solyc09g091730.2.1	Solyc12g098340.1.1	evm.TU.supercontig_59.134
ORTHOMCL8(10genes,8taxa):			AT5G55590	GSVIVT01014641001	LOC_Os07g41650.1	Potri.001G364200.1	Potri.001G365700.1	Sb02g038910.1	Solyc07g065350.1.1	Solyc07g065360.1.1	evm.TU.supercontig_12.178	evm_15.model.AmTr_v1.0_scaffold00028.11
ORTHOMCL9(9genes,7taxa):			AT2G21610	GSVIVT01009729001	GSVIVT01023786001	LOC_Os01g44340.1	Potri.004G156300.1	Sb03g028930.1	Solyc01g109740.2.1	Solyc04g080530.2.1	evm.TU.supercontig_26.309
ORTHOMCL10(8genes,8taxa):			Sm104861	AT1G05310	GSVIVT01015852001	LOC_Os08g10604.1	Potri.016G017700.1	Sb07g006050.1	Solyc07g043240.2.1	evm.TU.supercontig_8.275
ORTHOMCL11(8genes,8taxa):			AT3G17060	GSVIVT01034985001	LOC_Os03g19610.1	Potri.008G104800.1	Sb03g022950.1	Solyc12g099230.1.1	evm.TU.supercontig_1973.3	evm_15.model.AmTr_v1.0_scaffold00123.5
ORTHOMCL12(7genes,7taxa):			AT2G36710	GSVIVT01033712001	LOC_Os09g39760.1	Potri.006G120100.1	Sb02g012560.1	evm.TU.supercontig_5.128	evm_15.model.AmTr_v1.0_scaffold00140.9
ORTHOMCL13(5genes,4taxa):			GSVIVT01015022001	Potri.006G137100.1	evm.TU.supercontig_82.61	evm.TU.supercontig_82.62	evm_15.model.AmTr_v1.0_scaffold00007.302
ORTHOMCL14(3genes,3taxa):			Sb05g000900.1	corb_UMD_Coleochaete_c10080_c_s	evm.TU.supercontig_1540.1
